# Supplementary material for: Synthesis of a phenyl thio-β-d-galactopyranoside library from 1,5-difluoro-2,4-dinitrobenzene: discovery of efficient and selective monosaccharide inhibitors of galectin-7
Source: Royal Society of Chemistry journal article supplement (doi:10.1039/b502354h), 2005-01-01

## Supplementary data

### Synthesis of a phenyl thio- $\beta$ -D-galactopyranoside library from 1,5-difluoro-2,4-dinitrobenzene: Discovery of efficient and selective monosaccharide inhibitors of galectin-7

Ian Cumpstey<sup>a</sup>, Susanne Carlsson<sup>b</sup>, Hakon Leffler<sup>b</sup>, and Ulf J. Nilsson<sup>a\*</sup>

<sup>a</sup> Organic Chemistry, Lund University, Box 124, SE-221 00, Lund, SWEDEN. Fax: +46 46 2228218; Tel: +46 46 2228209; E-mail: ulf.nilsson@organic.lu.se

<sup>b</sup> Section MIG, Department of Laboratory Medicine, Lund University, Solvegatan 23, SE-223 62, Lund, SWEDEN

Proton nmr spectra of the final compounds **33-60**.

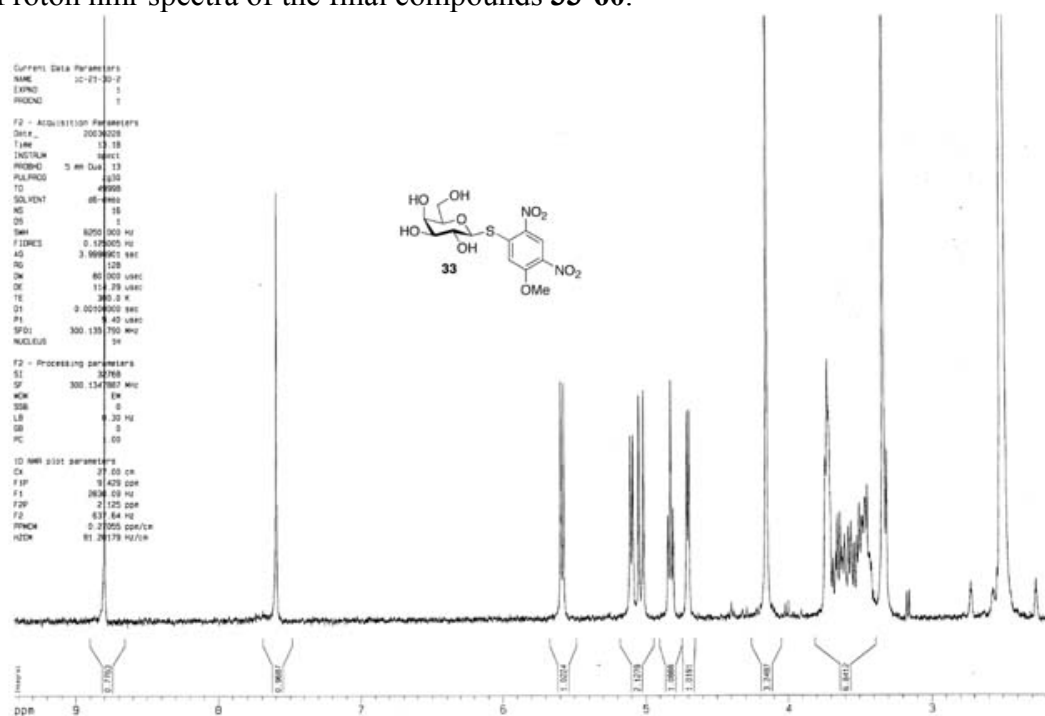

| 10 test circuit parameters |                |
|----------------------------|----------------|
| CK                         | 27.00 cm       |
| F1P                        | 9.264 GHz      |
| F1                         | 2760.32 Hz     |
| F2P                        | 9.450 GHz      |
| F2                         | 1037.02 Hz     |
| FWHM                       | 0.21513 GHz/cm |
| QTCW                       | 64.56870 Hz/cm |

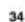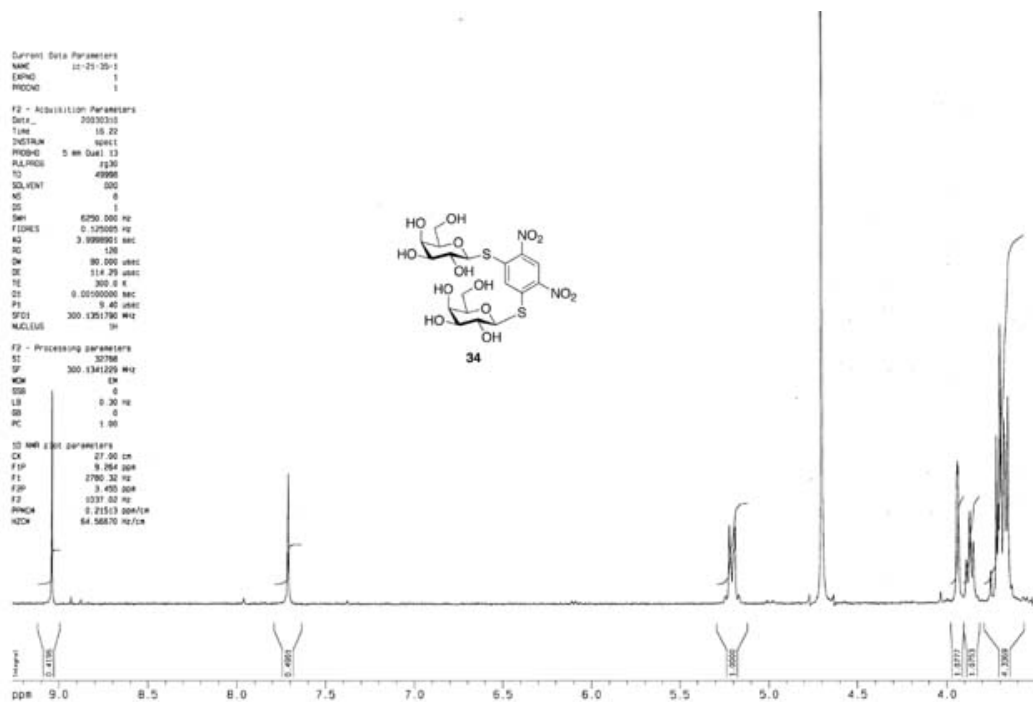

| 10 mm size parameters |                 |
|-----------------------|-----------------|
| CX                    | 27.00 cm        |
| FIP                   | 0.995 g/cm      |
| F1                    | 2083.30 Hz      |
| F2F                   | 0.424 g/cm      |
| F2                    | 188.61 Hz       |
| FWHM                  | 0.31596 g/cm/cm |
| H2CM                  | 126.43453 Hz/cm |

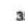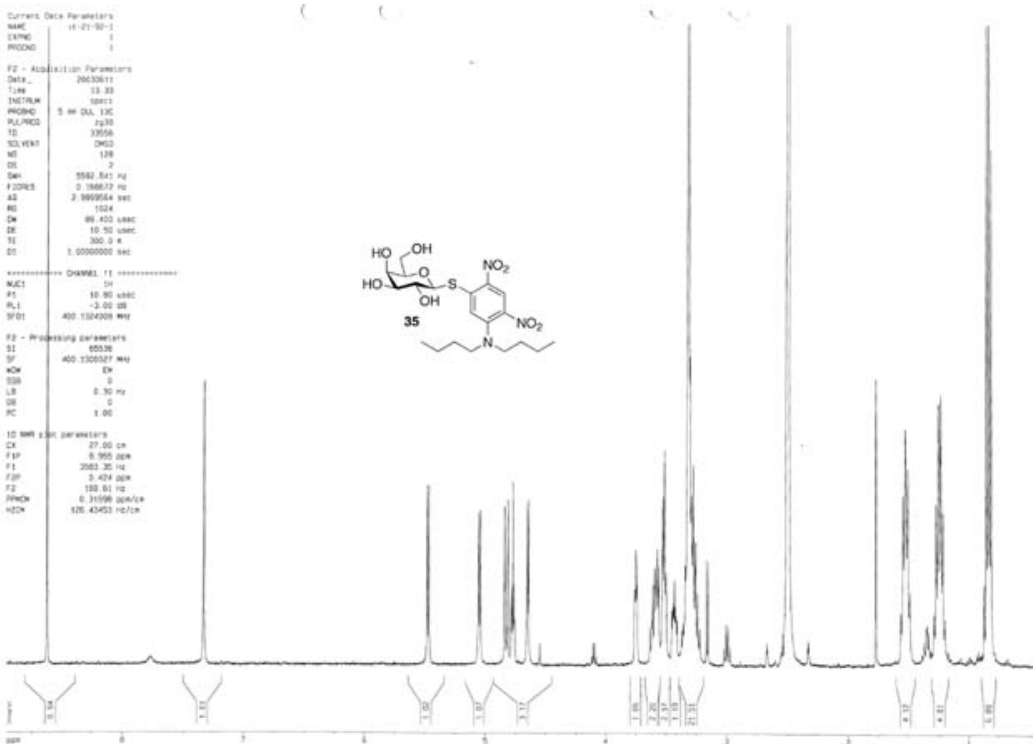

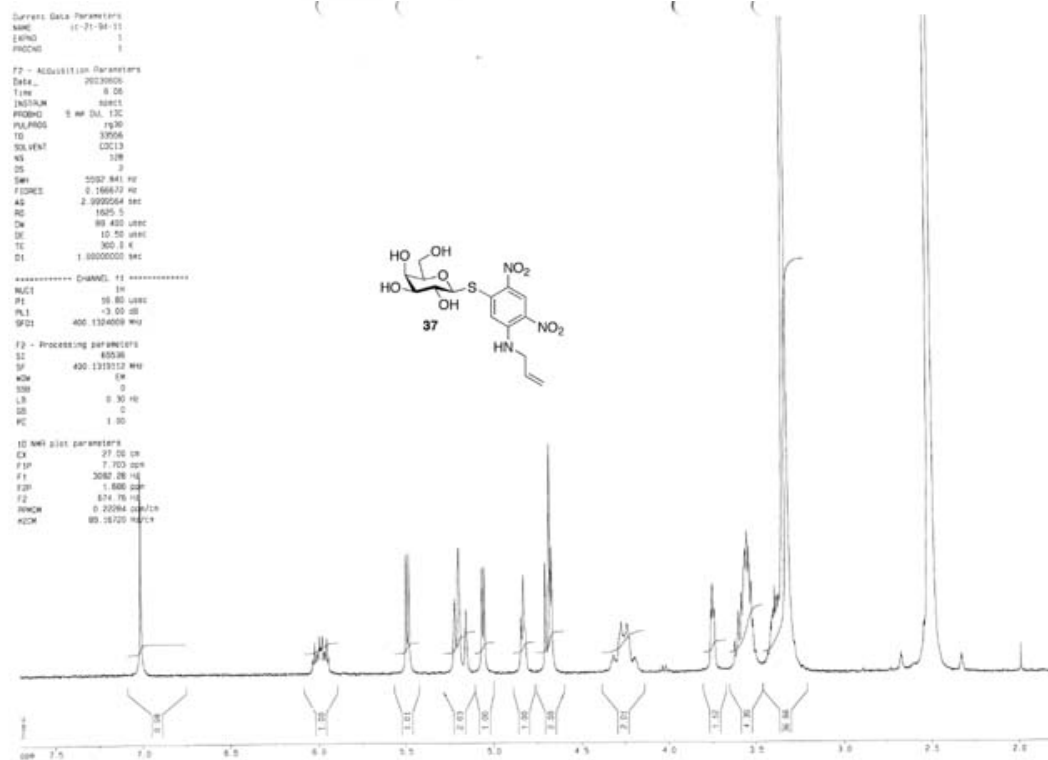

Current Data Parameters  
NAME 11-21-09-11  
EXNO 1  
PROCNO 1

F2 - Acquisition Parameters  
Date\_ 20030606  
Time 7.34  
INSTRUM spect  
PROBHD 5 mm QNP 1H/1  
PULPROG zg30  
TD 32768  
SOLVENT CDCl3  
NS 128  
DS 2  
SWH 10062.841 Hz  
FIDRES 0.166670 Hz  
AQ 2.9999564 sec  
RG 1632.5  
CW 86.400 uHz  
DE 16.50 uHz  
TE 300.0 K  
DT 1.0000000 sec

===== CHANNEL f1 =====  
NUC1 13  
P1 10.00 uHz  
PL1 -3.00 dB  
SFO1 400.1304008 MHz

F2 - Processing Parameters  
SI 65536  
SF 400.1315112 MHz  
WDW EM  
SSB 0  
LB 0.30 Hz  
GB 0  
PC 1.00

1D NMR data parameters  
CA 27.00 cm  
F1P 7.627 dB  
F1 100.00 Hz  
F2P 0.970 dB  
F2 100.00 Hz  
NUC1 13  
NUC2 1H  
AQ 0.0000000 sec  
PC 1.00

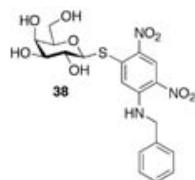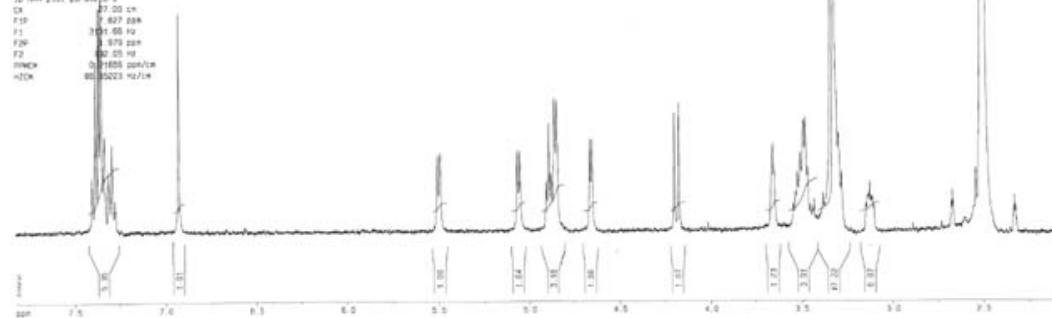

Current Data Parameters  
NAME 11-22-09-1  
EXNO 1  
PROCNO 1

F2 - Acquisition Parameters  
Date\_ 20030606  
Time 9.29  
INSTRUM spect  
PROBHD 5 mm QNP 1H/1  
PULPROG zg30  
TD 32768  
SOLVENT DMSO-d6  
NS 128  
DS 2  
SWH 10062.841 Hz  
FIDRES 0.166670 Hz  
AQ 2.9999564 sec  
RG 1632.5  
CW 86.400 uHz  
DE 16.50 uHz  
TE 300.0 K  
DT 1.0000000 sec

F2 - Processing Parameters  
SI 65536  
SF 400.1315112 MHz  
WDW EM  
SSB 0  
LB 0.30 Hz  
GB 0  
PC 1.00

1D NMR data parameters  
CA 27.00 cm  
F1P 7.627 dB  
F1 100.00 Hz  
F2P 0.970 dB  
F2 100.00 Hz  
NUC1 13  
NUC2 1H  
AQ 0.0000000 sec  
PC 1.00

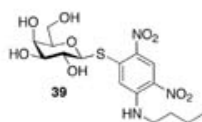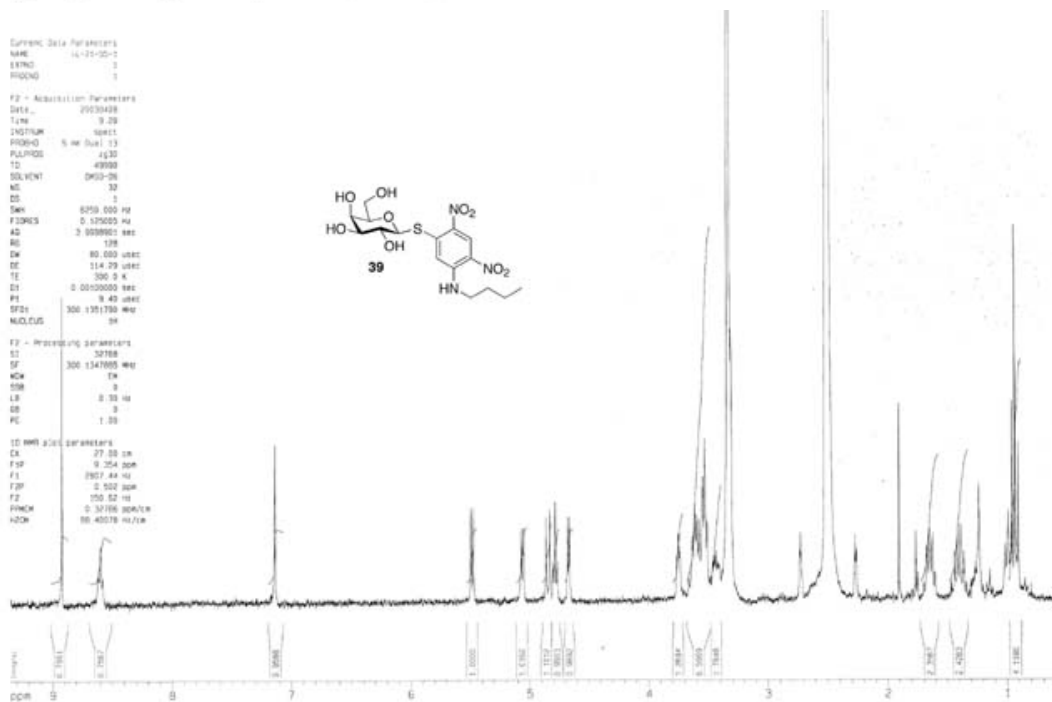

## Supplementary data

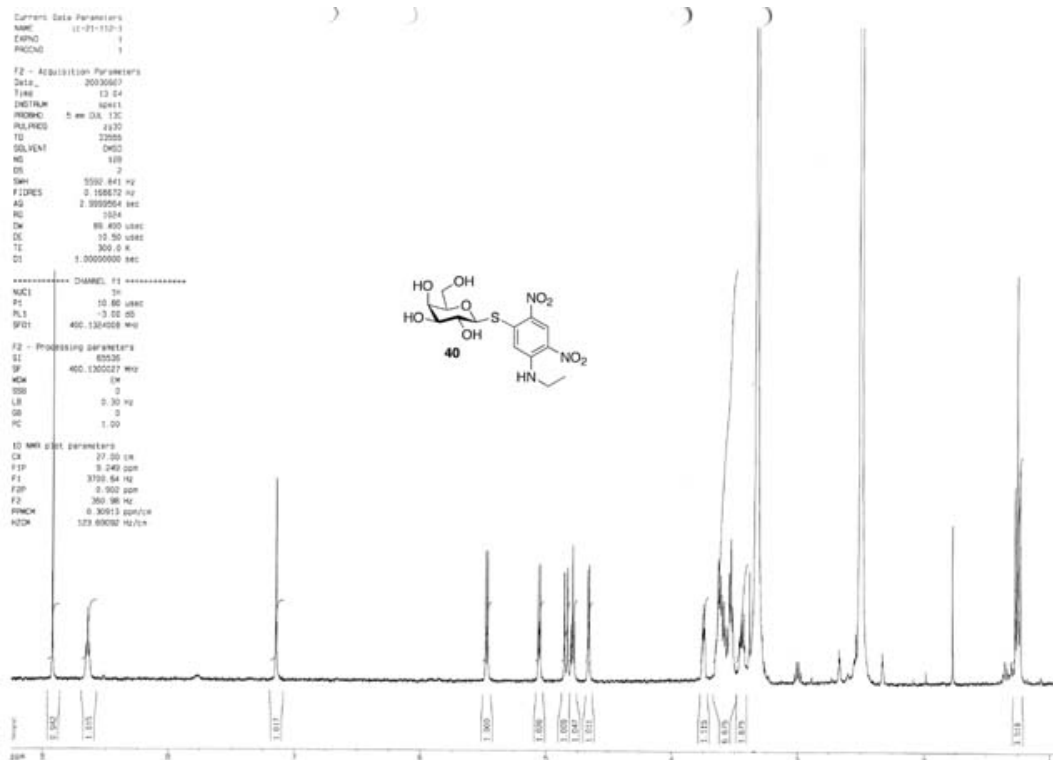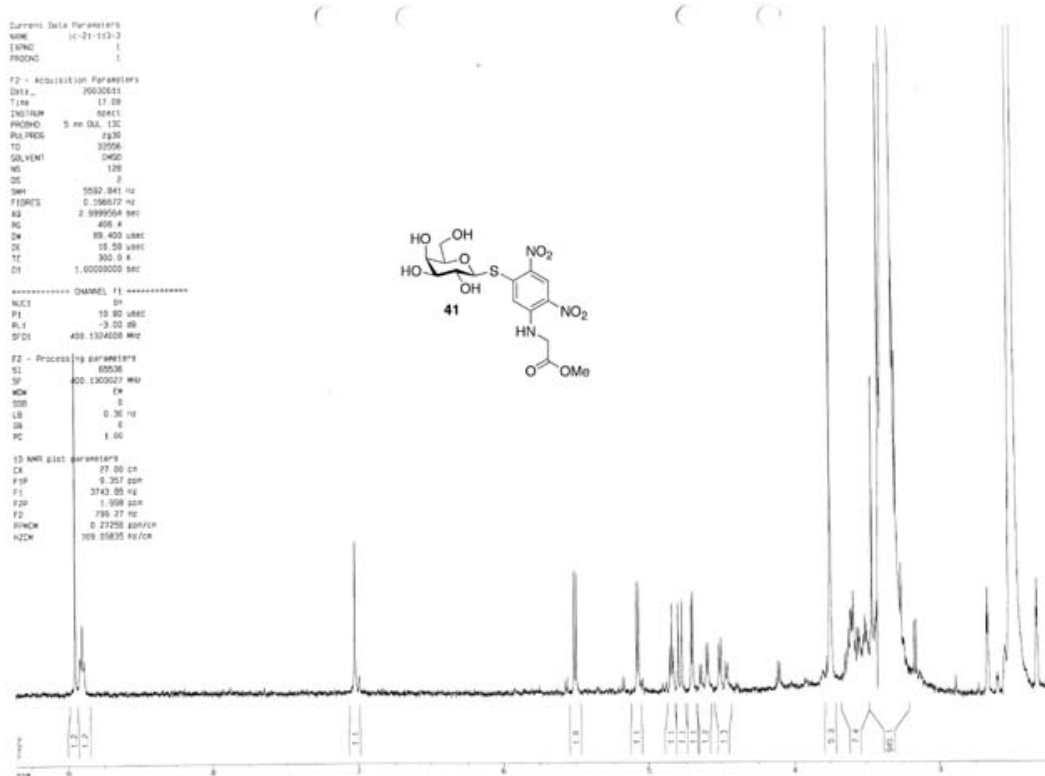

Current Data Parameters  
NAME 11-21-108-1  
EXPNO 1  
PROCNO 1

F2 - Acquisition Parameters  
Date\_ 20230204  
Time 15:30  
INSTRUM spect  
PROBHD 5 mm QNP 13C  
PULPROG zgpg30  
TD 32768  
SOLVENT DMSO  
NS 64  
DS 2  
SWH 5502.841 Hz  
FIDRES 0.166872 Hz  
AQ 2.9992564 sec  
RG 3274  
SQ 88.400 uhrz  
DC 15.50 uhrz  
TE 300.2 K  
D1 1.00000000 sec

===== CHANNEL f1 =====  
NUC1 13C  
P1 12.00 uhrz  
PL1 -1.00 dB  
SFO1 400.1340000 MHz

F2 - Processing parameters  
SI 32768  
SF 400.1340000 MHz  
WDW EM  
SSB 0  
LB 3.30 Hz  
GB 0  
PC 1.00

1D NMR plot parameters  
CX 27.00 cm  
F1 10.208 uhrz  
F2 3719.33 Hz  
F3 0.303 uhrz  
F4 361.15 Hz  
F5 2.1084 uhrz/cm  
F6 124.37880 Hz/cm

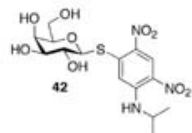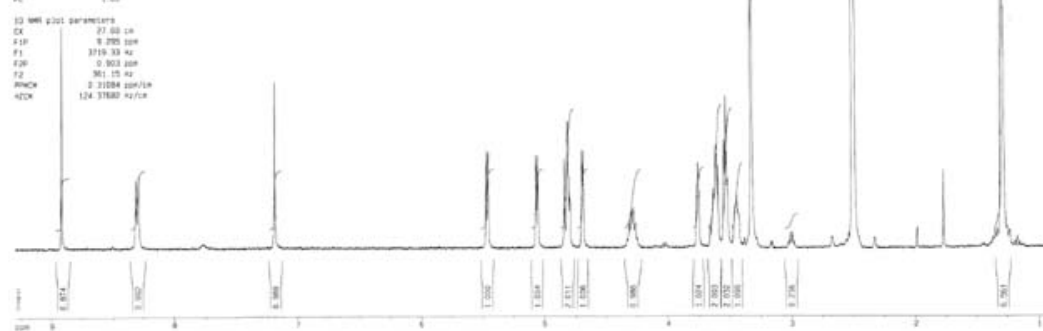

Current Data Parameters  
NAME 11-21-108-1  
EXPNO 1  
PROCNO 1

F2 - Acquisition Parameters  
Date\_ 20230416  
Time 19:05  
INSTRUM spect  
PROBHD 5 mm QNP 13C  
PULPROG zgpg30  
TD 32768  
SOLVENT DMSO  
NS 64  
DS 2  
SWH 5502.841 Hz  
FIDRES 0.166872 Hz  
AQ 2.9992564 sec  
RG 3274  
SQ 88.400 uhrz  
DC 15.50 uhrz  
TE 300.2 K  
D1 1.00000000 sec

===== CHANNEL f1 =====  
NUC1 13C  
P1 12.00 uhrz  
PL1 -1.00 dB  
SFO1 400.1340000 MHz

F2 - Processing parameters  
SI 32768  
SF 400.1340000 MHz  
WDW EM  
SSB 0  
LB 3.30 Hz  
GB 0  
PC 1.00

1D NMR plot parameters  
CX 27.00 cm  
F1 10.208 uhrz  
F2 3719.33 Hz  
F3 0.303 uhrz  
F4 361.15 Hz  
F5 2.1084 uhrz/cm  
F6 124.37880 Hz/cm

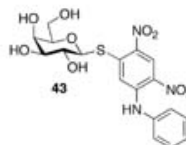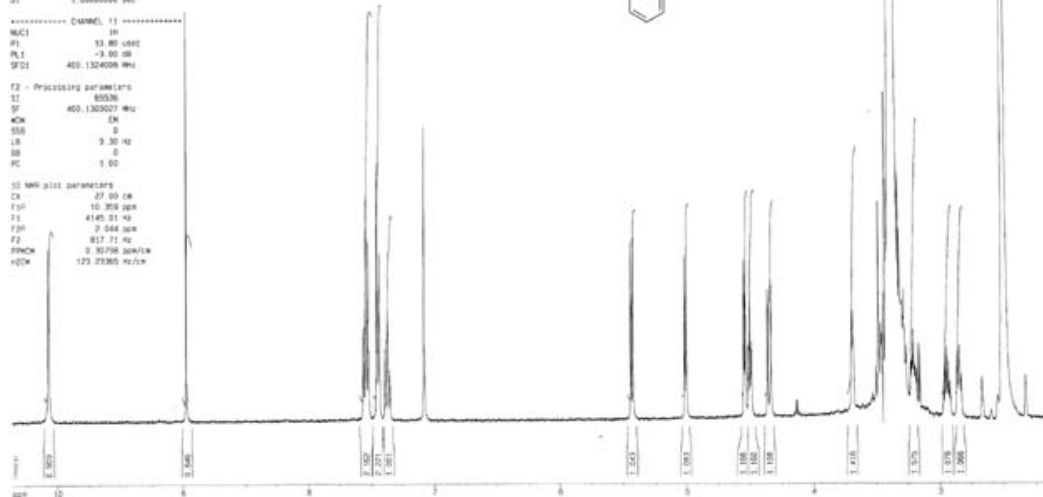

## Supplementary data

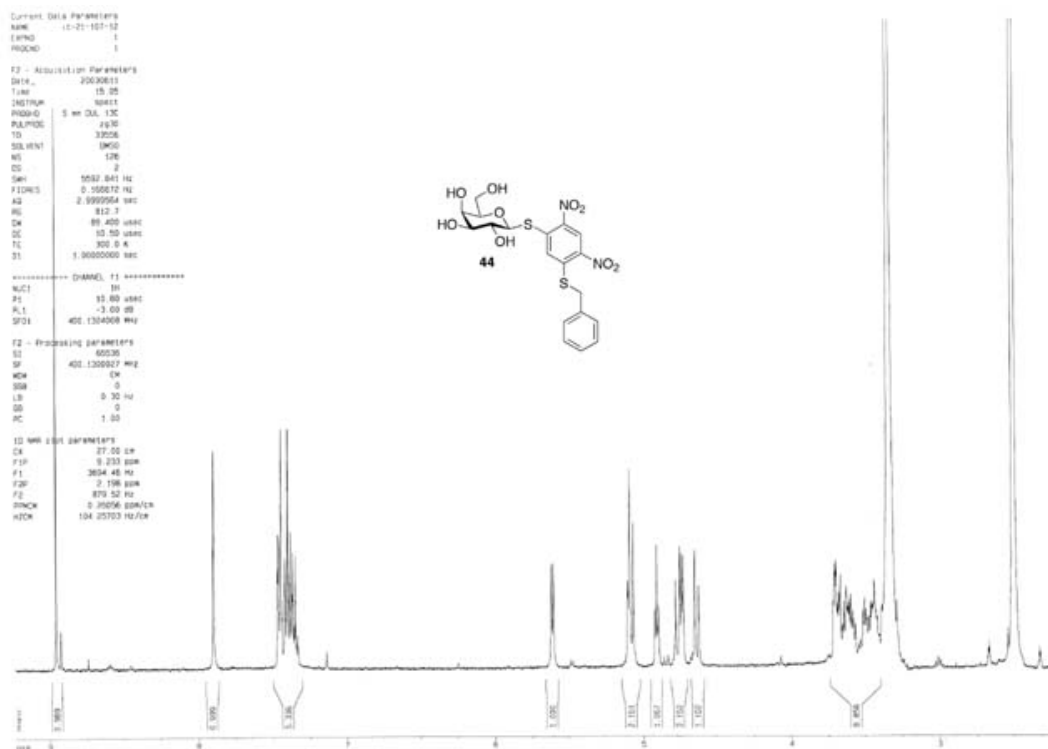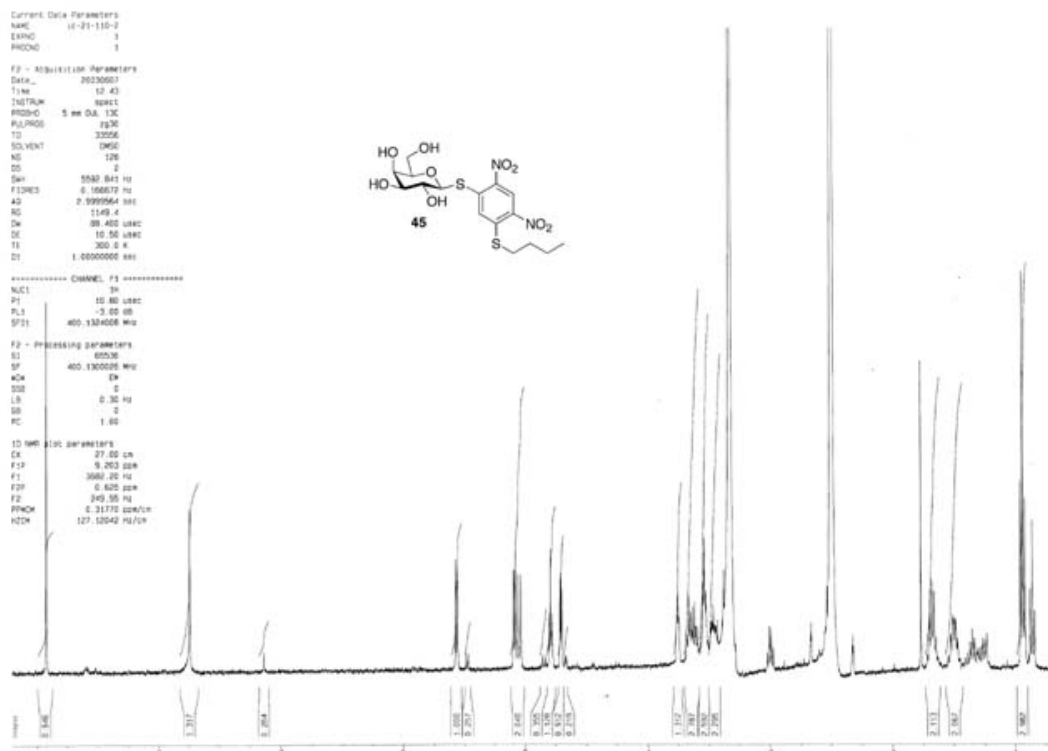

Current Data Parameters  
NAME 14-21-50-11  
EXPNO 1  
PROCNO 1

F2 - Acquisition Parameters  
Date\_ 20030809  
Time 12.02  
INSTRUM spect  
PROBHD 5 mm DAI 13C  
PULPROG zgpg30  
TD 32768  
SOLVENT CDCl3  
NS 128  
DS 4  
SWH 9500.841 Hz  
FIDRES 0.166872 Hz  
AQ 3.3899564 sec  
RG 1448.2  
DM 88.400 usec  
DE 18.50 usec  
TE 300.2 K  
D1 1.0000000 sec

===== CHANNEL f1 =====  
NUC1 1H  
P1 19.80 usec  
PL1 -3.00 dB  
SFO1 400.1324508 MHz

F2 - Processing parameters  
SI 65536  
SF 400.1315113 MHz  
WDW EM  
SSB 0  
LB 0.30 Hz  
GB 0  
PC 1.00

1D NMR plot parameters  
CX 27.00 cm  
F1P 0.153 ppm  
F1 3061.21 Hz  
F2P 0.930 ppm  
F2 380.89 Hz  
PQMC 0.26513 ppm/cm  
H2CM 100.00611 Hz/cm

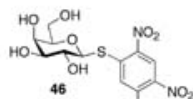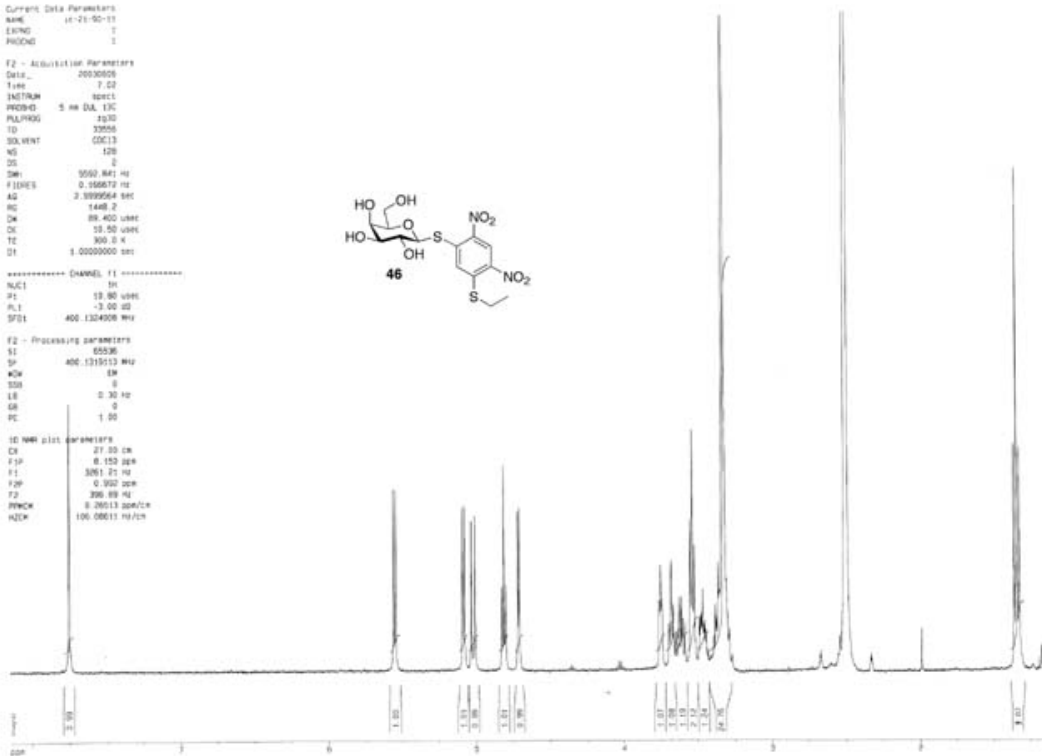

Current Data Parameters  
NAME 14-21-44-11  
EXPNO 2  
PROCNO 1

F2 - Acquisition Parameters  
Date\_ 20030326  
Time 13.49  
INSTRUM spect  
PROBHD 5 mm DAI 13  
PULPROG zgpg30  
TD 49998  
SOLVENT CDCl3  
NS 1  
DS 1  
SWH 6250.000 Hz  
FIDRES 0.170000 Hz  
AQ 3.3699501 sec  
RG 120  
DM 80.000 usec  
DE 114.29 usec  
TE 300.2 K  
D1 0.00100000 sec  
P1 9.40 usec  
SFO1 300.1351790 MHz  
NUC1 1H

F2 - Processing parameters  
SI 32768  
SF 300.1340559 MHz  
WDW EM  
SSB 0  
LB 0.30 Hz  
GB 0  
PC 1.00

1D NMR plot parameters  
CX 27.00 cm  
F1P 1.553 ppm  
F1 3061.04 Hz  
F2P 1.030 ppm  
F2 381.78 Hz  
PQMC 0.16722 ppm/cm  
H2CM 98.18721 Hz/cm

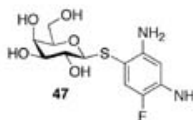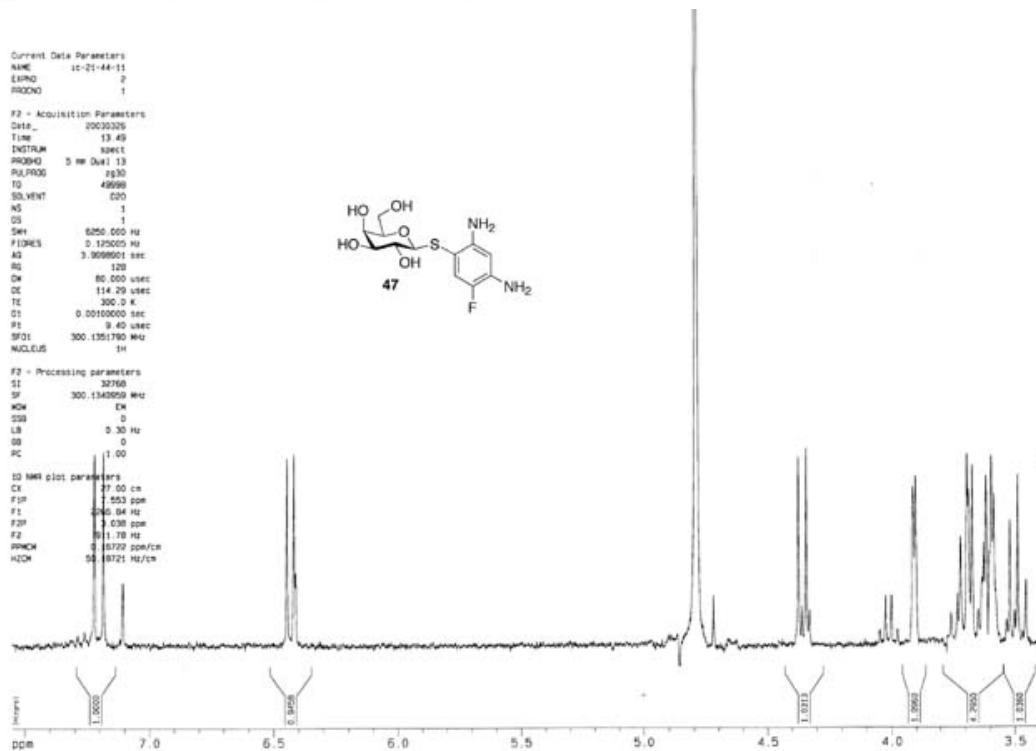



## Supplementary data

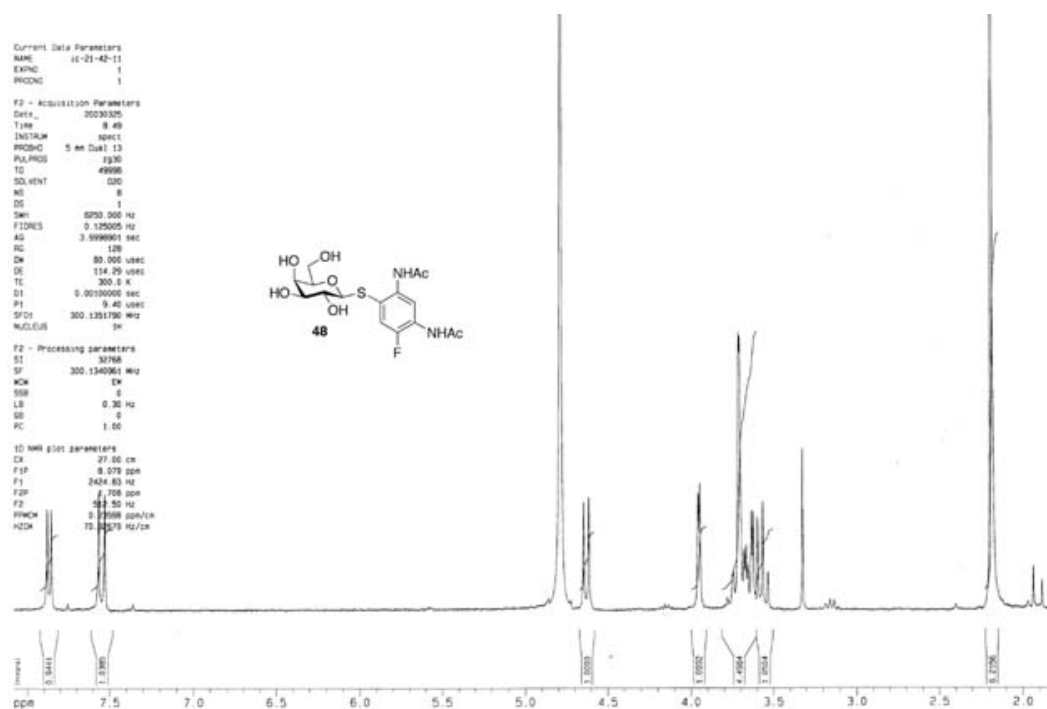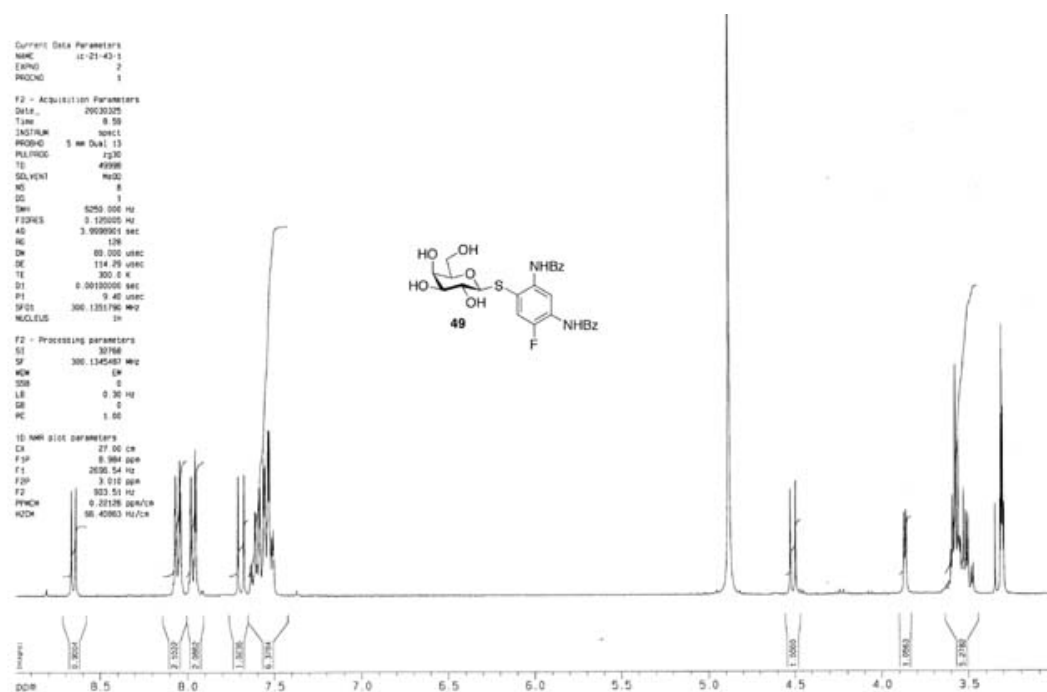

Current Data Parameters  
NAME 10-21-10-1  
EXPNO 1  
PROCNO 1

F2 - Acquisition Parameters  
Date\_ 20030611  
Time 05:40  
INSTRUM spect  
PROBHD 5 mm QNP 13C  
PULPROG zgpg30  
TD 32768  
SOLVENT DMSO  
NS 128  
DS 2  
SWH 5092.841 Hz  
FIDRES 0.166672 Hz  
AQ 2.999964 sec  
RG 429.4  
DM 88.400 usec  
DE 19.50 usec  
TE 300.2 K  
SI 1.5000000 sec

===== CHANNEL f1 =====  
NUC1 13C  
P1 19.80 usec  
PL1 -3.00 dB  
SFO1 400.134000 MHz  
F2 - Processing parameters  
SI 65536  
SF 400.130000 MHz  
WDW EM  
SSB 0  
LB 0.30 Hz  
GB 0  
PC 1.00

1D NMR plot parameters  
CA 27.00 cm  
FAP 9.708 ppm  
FI 3984.43 Hz  
F2 0.503 ppm  
F3 225.26 Hz  
PUNCH 0.34000 sec/Hz  
H2O 136.25578 Hz/Hz

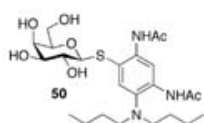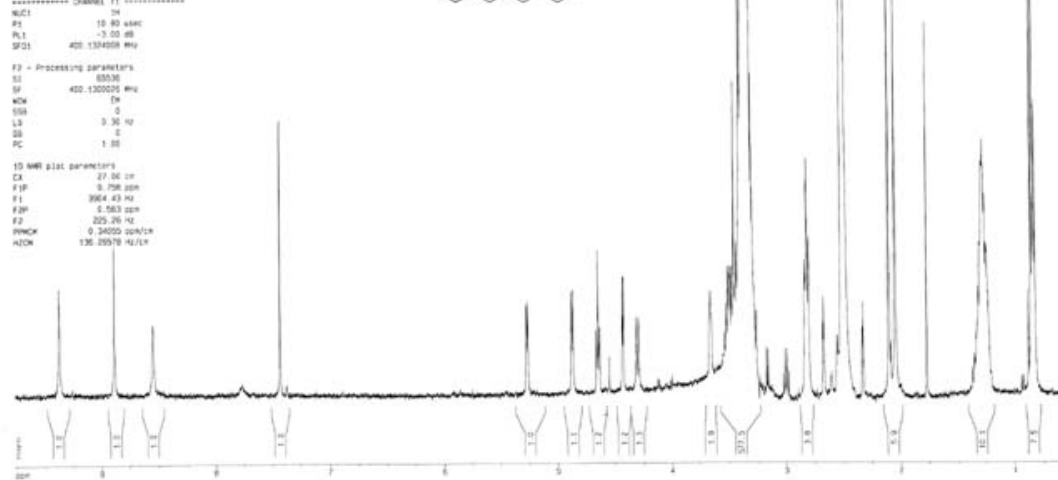

Current Data Parameters  
NAME 10-21-10-1  
EXPNO 1  
PROCNO 1

F2 - Acquisition Parameters  
Date\_ 20030611  
Time 13:01  
INSTRUM spect  
PROBHD 5 mm QNP 13C  
PULPROG zgpg30  
TD 32768  
SOLVENT DMSO  
NS 128  
DS 2  
SWH 5092.841 Hz  
FIDRES 0.166672 Hz  
AQ 2.999964 sec  
RG 429.4  
DM 88.400 usec  
DE 19.50 usec  
TE 300.2 K  
SI 1.5000000 sec

===== CHANNEL f1 =====  
NUC1 13C  
P1 19.80 usec  
PL1 -3.00 dB  
SFO1 400.134000 MHz  
F2 - Processing parameters  
SI 65536  
SF 400.130000 MHz  
WDW EM  
SSB 0  
LB 0.30 Hz  
GB 0  
PC 1.00

1D NMR plot parameters  
CA 27.00 cm  
FAP 9.708 ppm  
FI 3984.43 Hz  
F2 0.503 ppm  
F3 225.26 Hz  
PUNCH 0.34000 sec/Hz  
H2O 136.25578 Hz/Hz

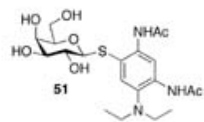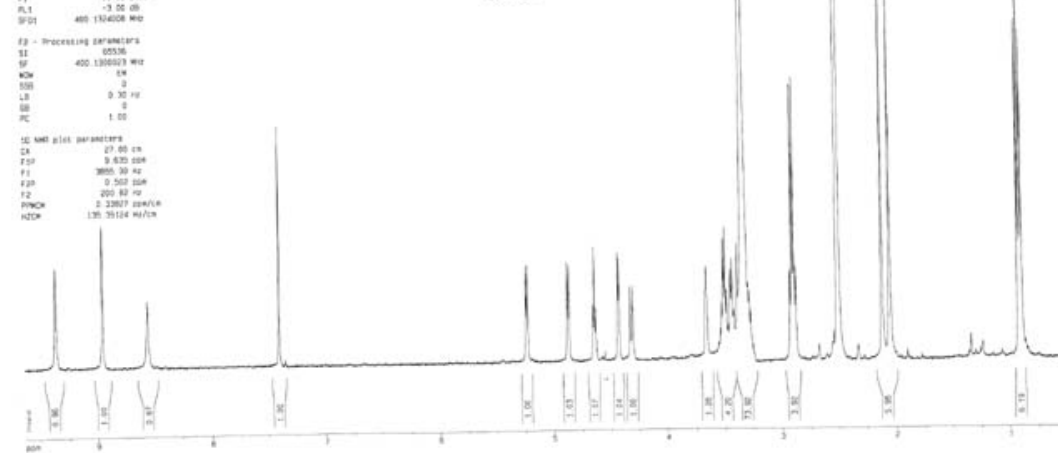

## Supplementary data

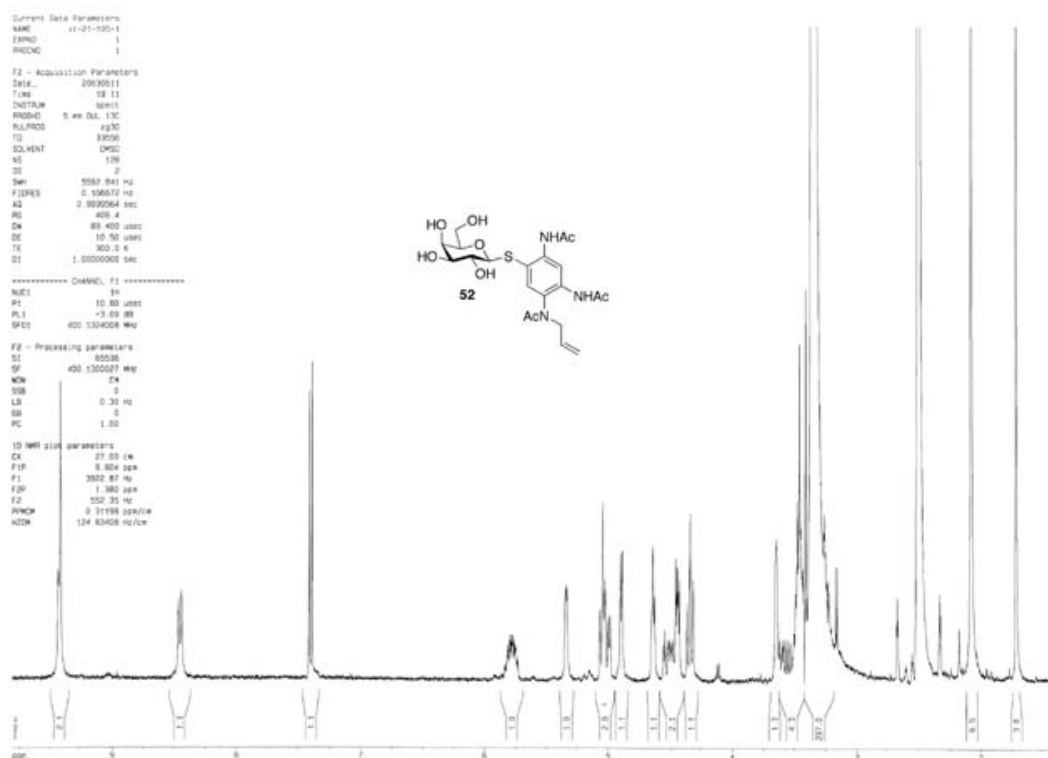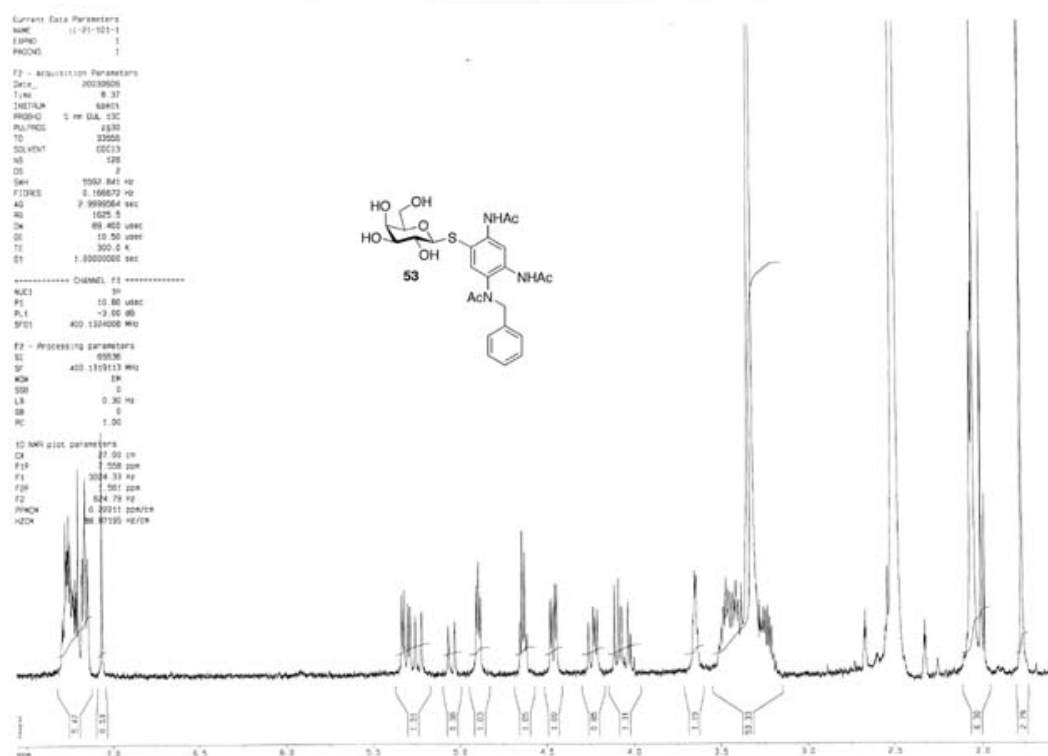

Current Data Parameters  
NAME 117-103-1  
EXPNO 1  
PROCNO 1

F2 - Acquisition Parameters  
Date\_ 20030811  
Time 14.33  
INSTRUM spect  
PROBHD 5 mm QNP 1H/13C  
PULPROG zgpg30  
TD 32768  
SOLVENT DMSO  
AQ 128  
DS 2  
SWH 500.841 Hz  
FIDRES 0.166872 Hz  
AQ 2.5999564 sec  
RG 1149.4  
CW 89.400 usec  
DE 10.50 usec  
TE 300.0 K  
DT 1.0000000 sec

\*\*\*\*\* CHANNEL f1 \*\*\*\*\*  
NUC1 13  
P1 10.00 usec  
PL1 -2.00 dB  
SFO1 400.1304008 MHz

F2 - Processing parameters  
SI 65536  
SF 400.1300077 MHz  
WDW EM  
SSB 0  
LB 0.30 Hz  
GB 0  
PC 1.00

1D NMR plot parameters  
CX 27.00 cm  
F1P 9.711 ppm  
F1 3995.93 Hz  
F2P 0.455 ppm  
F2 181.96 Hz  
PWCW 0.34284 ppm/cm  
H2CW 137.18033 Hz/cm

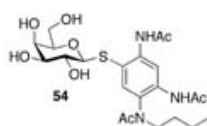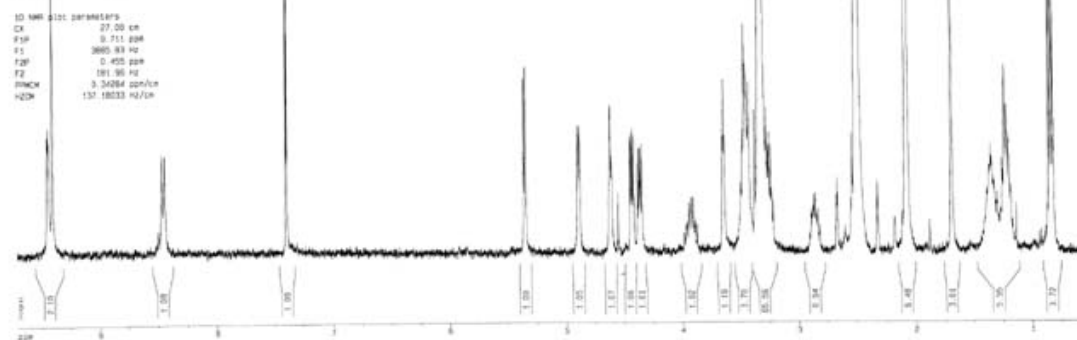

Current Data Parameters  
NAME 117-1  
EXPNO 1  
PROCNO 1

F2 - Acquisition Parameters  
Date\_ 20030811  
Time 13.51  
INSTRUM spect  
PROBHD 5 mm QNP 1H/13C  
PULPROG zgpg30  
TD 32768  
SOLVENT DMSO  
AQ 128  
DS 2  
SWH 500.841 Hz  
FIDRES 0.166872 Hz  
AQ 2.5999564 sec  
RG 1149.4  
CW 89.400 usec  
DE 10.50 usec  
TE 300.0 K  
DT 1.0000000 sec

\*\*\*\*\* CHANNEL f1 \*\*\*\*\*  
NUC1 13  
P1 10.00 usec  
PL1 -2.00 dB  
SFO1 400.1304008 MHz

F2 - Processing parameters  
SI 65536  
SF 400.1300077 MHz  
WDW EM  
SSB 0  
LB 0.30 Hz  
GB 0  
PC 1.00

1D NMR plot parameters  
CX 27.00 cm  
F1P 9.773 ppm  
F1 3910.52 Hz  
F2P 0.515 ppm  
F2 206.65 Hz  
PWCW 0.34284 ppm/cm  
H2CW 137.18033 Hz/cm

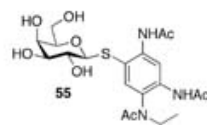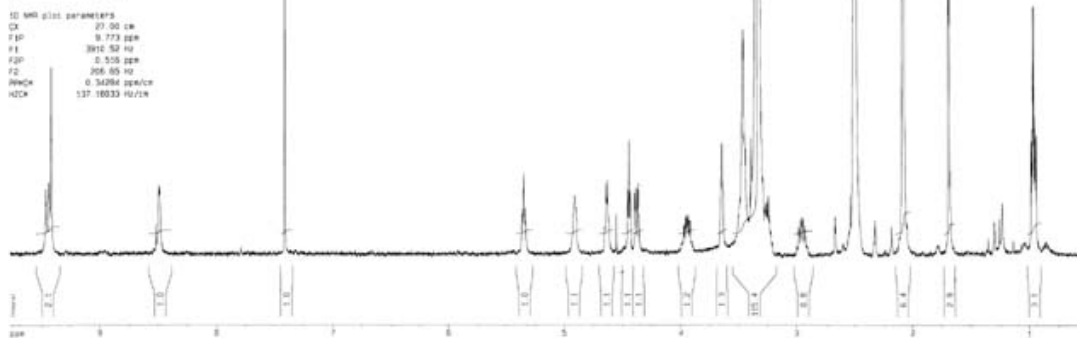

## Supplementary data

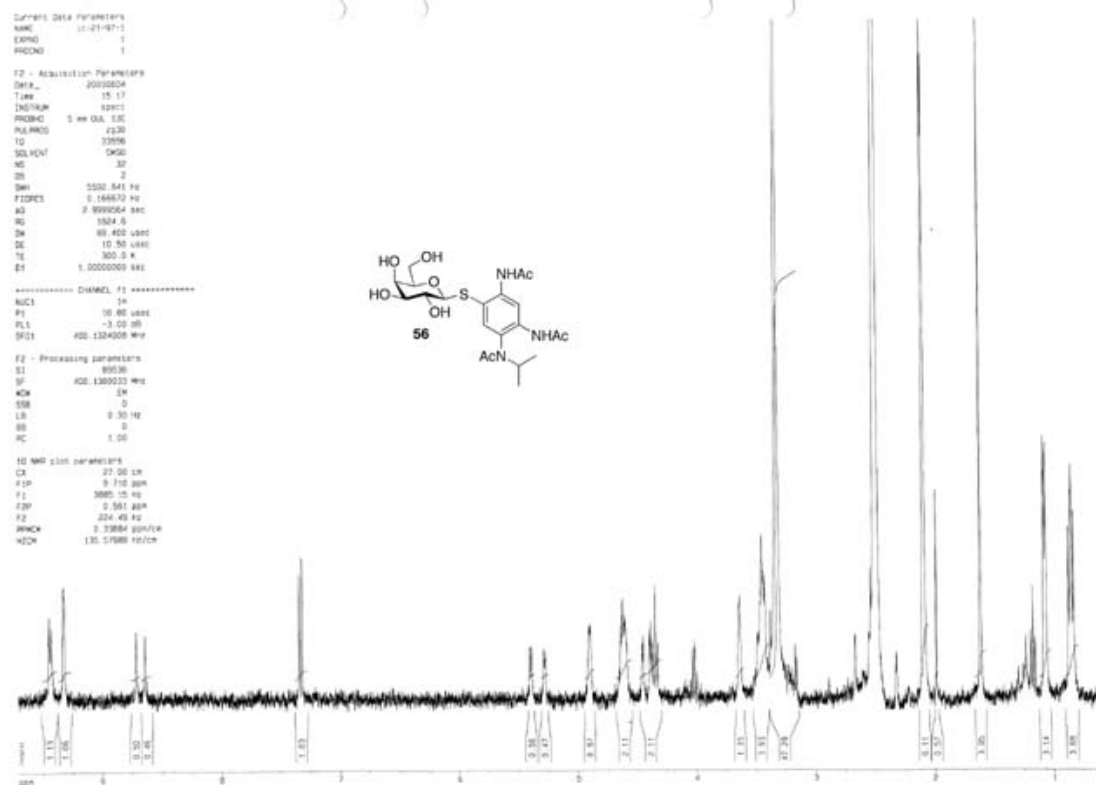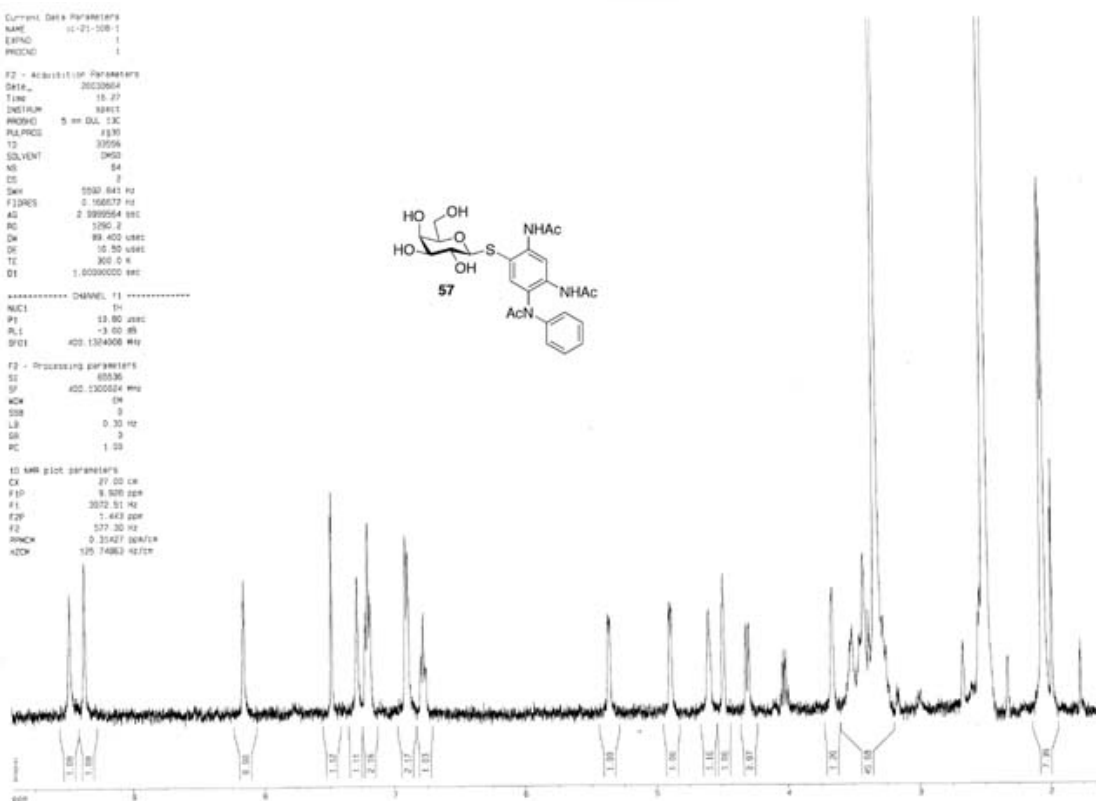

| 10 km/s plot parameters |              |
|-------------------------|--------------|
| CA                      | 27.00 km     |
| F1P                     | 9.000 dB     |
| F1                      | 3601.17 Hz   |
| F2P                     | 0.000 dB     |
| F2                      | 0.00 Hz      |
| SNRICH                  | 0.33333 dB   |
| H20M                    | 133.37006 Hz |

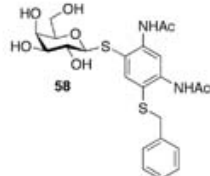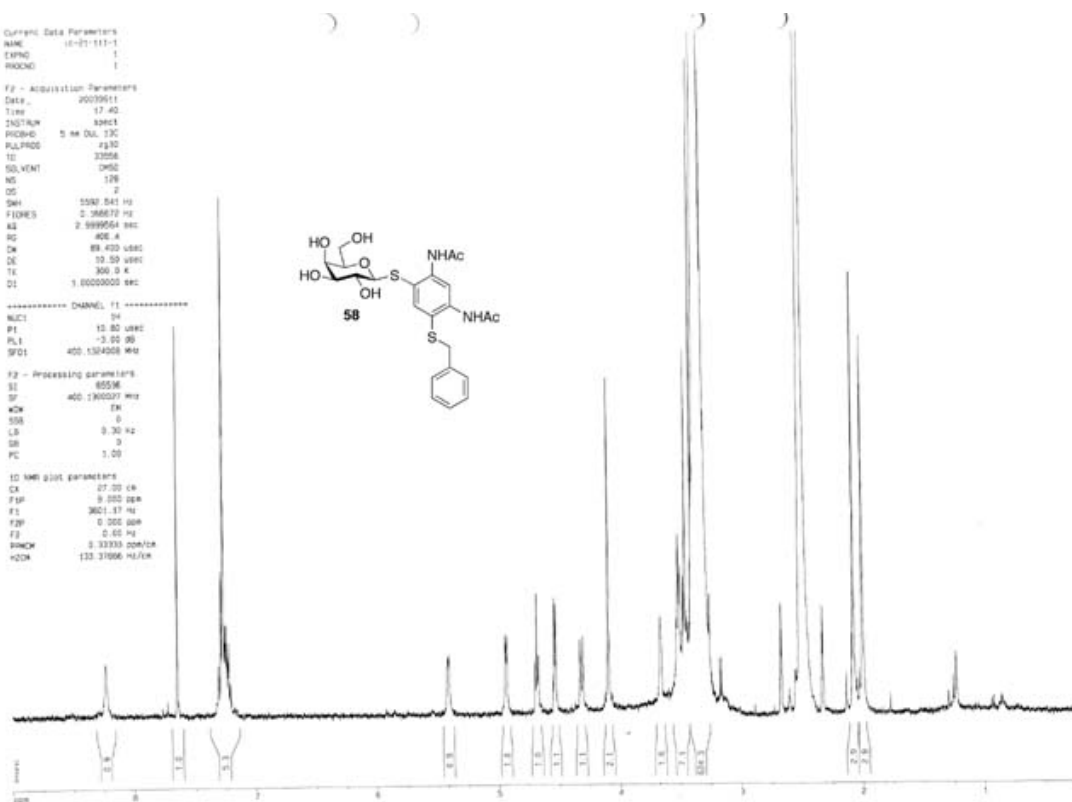

|                        |                |
|------------------------|----------------|
| SD with six parameters |                |
| CM                     | 27.00 cm       |
| F <sub>95</sub>        | 9.605 g/g      |
| F <sub>1</sub>         | 3867.40 Hz     |
| F <sub>20</sub>        | 0.532 g/g      |
| F <sub>2</sub>         | 212.91 Hz      |
| FWHM                   | 0.33627 g/g    |
| WDM                    | 135.85124 Hz/g |

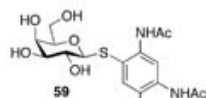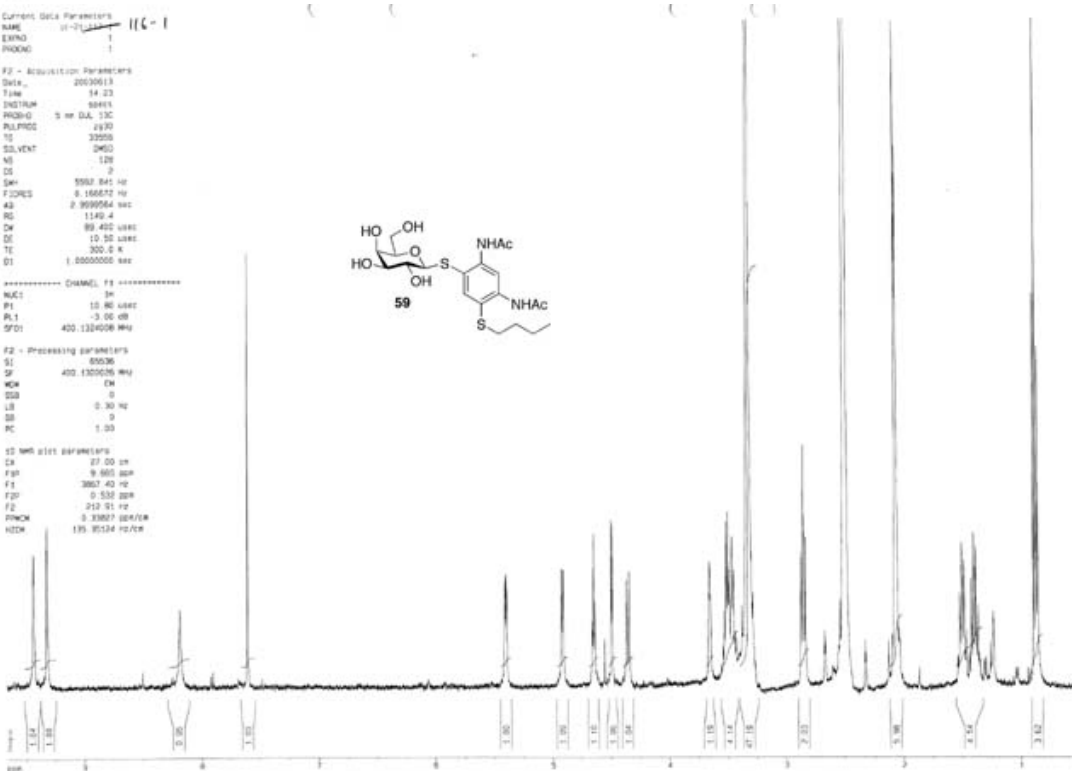

## Supplementary data

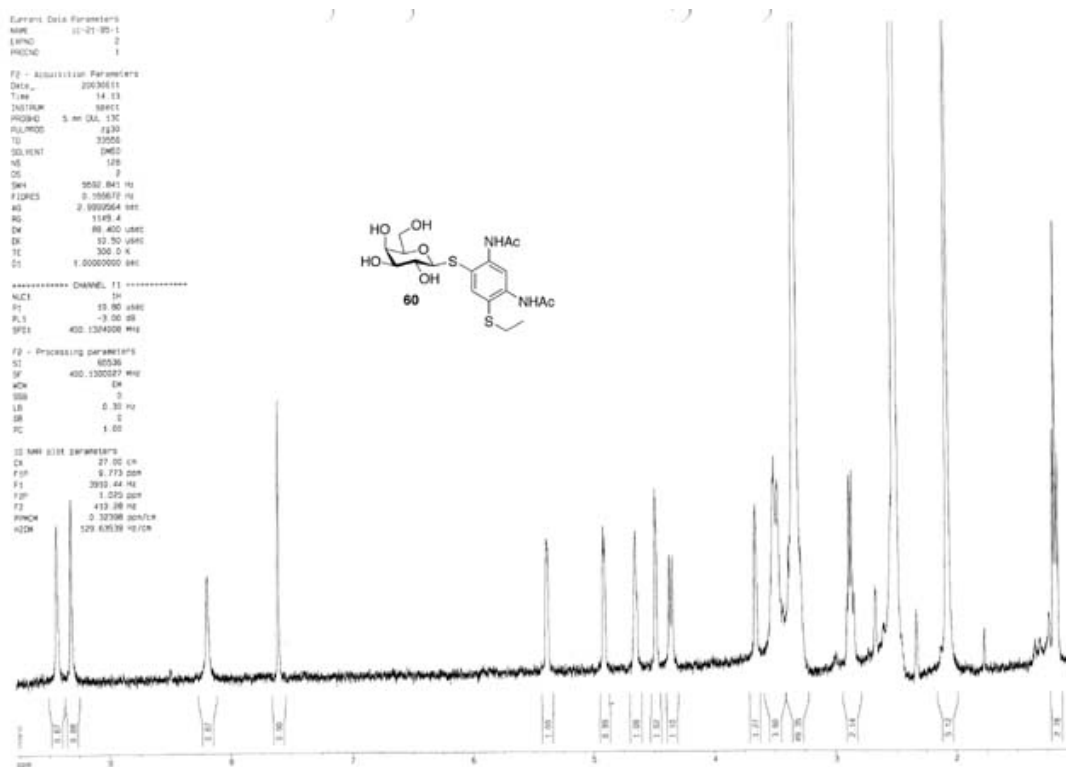

Supplement: b502354h.pdf [file b502354h.pdf]
